# Supplementary material
Source: PubMed Central journal article supplement (PMC2077053)
Supplement: pnas_0703890104_5.pdf [file pnas_0703890104_5.pdf]

Table 3. Clusters of intergenic miRNAs with complete EST coverage

| Cluster | miRNAs            | Chromosome (strand) | Mapped ESTs                                                                      | 5'/3'                                  | Tissue                                                                                           |
|---------|-------------------|---------------------|----------------------------------------------------------------------------------|----------------------------------------|--------------------------------------------------------------------------------------------------|
| 1       | hsa-mir-374~545   | X (-)               | AV754330<br>AW629991<br>AA775951<br>CF994086<br>CF994119<br>AL698517             | 5'<br>5'<br>3'<br>5'<br>5'<br>5'       | Pituitary<br>Genitourinary tract<br>Brain<br>Placenta<br>Placenta<br>—*                          |
| 2       | hsa-mir-15a~16-1  | 13 (-)              | BF032226                                                                         | 5'                                     | Ovary                                                                                            |
| 3       | hsa-mir-200c~141  | 12 (+)              | BX094730<br>AI695443<br>BM855863<br>AA863395<br>AA863389<br>AI969882<br>BX644926 | 5'<br>3'<br>5'<br>3'<br>3'<br>3'<br>3' | Colon<br>Colon<br>Stomach<br>Pooled germ cell tumors<br>Pooled germ cell tumors<br>Prostate<br>— |
| 4       | hsa-mir-144~451   | 17 (-)              |                                                                                  |                                        |                                                                                                  |
| 5       | hsa-mir-29b-2~29c | 1 (-)               | BF089238                                                                         | —                                      | Head and neck                                                                                    |

\*—, unannotated.
