# Supplementary material
Source: PubMed Central journal article supplement (PMC2077053)
Supplement: pnas_0703890104_6.pdf [file pnas_0703890104_6.pdf]

Table 4. Top 5 of 240 TFs identified within 2 kb upstream of the annotated transcription start sites of RefSeq genes

| TransFac ID           | TransFac class                                   | Factor name                                  | Gene ontology                                      | P value   |
|-----------------------|--------------------------------------------------|----------------------------------------------|----------------------------------------------------|-----------|
| NRF2_01*              | Leucine zipper                                   | Nuclear respiratory factor 2                 | Transcription from RNA polymerase II promoter      | 1.946E-09 |
| SREBP1_01*            | Basic region + helix-loop-helix + leucine zipper | Sterol regulatory element-binding protein 1a | Regulation of transcription from RNA polymerase II | 0.0000006 |
| CREBP1CJUN_01 (AP-1)* | Leucine zipper factor                            | c-Jun                                        | Cell growth and maintenance                        | 0.000002  |
| E2F_02                | Fork head                                        | E2f                                          | Transcription factor activity                      | 0.001     |
| RFX1_02               | Fork head                                        | EF-C                                         | RNA polymerase II transcription factor activity    | 0.005     |

\*Identified by previous study.
