# Supplementary material
Source: PubMed Central journal article supplement (PMC2077053)
Supplement: pnas_0703890104_7.pdf [file pnas_0703890104_7.pdf]

**Table 5. Length of transcripts <10 kb**

| miRNA/cluster                                   | Chromosome (Strand) | Genomic coordinates of pre-miRNA/cluster | Approximate 5' boundary of the primary transcript | Approximate 3' boundary of the primary transcript | Approximate length (bp) of the primary transcript | Supporting evidences             |
|-------------------------------------------------|---------------------|------------------------------------------|---------------------------------------------------|---------------------------------------------------|---------------------------------------------------|----------------------------------|
| <a href="#">hsa-mir-200c~141</a>                | 12 (+)              | 6943123-6943615                          | 6942737                                           | 6943865                                           | 1128                                              | TSS,ESTs,Ditags,polyA            |
| <a href="#">hsa-mir-497-195</a>                 | 17 (-)              | 6861658-6862065                          | 6861211                                           | 6863698                                           | 2487                                              | ESTs,5'CAGE                      |
| <a href="#">hsa-mir-34b~34c</a>                 | 11 (+)              | 11088873-110889450                       | 110888630                                         | 110889820                                         | 1190                                              | TSS,CpG,5'CAGE,ESTs,polyA        |
| <a href="#">hsa-mir-29b-2~29c</a>               | 1 (-)               | 206041820-206042491                      | 206041489                                         | 206046102                                         | 4613                                              | ESTs,5'CAGE,Ditags,polyA         |
| <a href="#">hsa-mir-572</a>                     | 4 (+)               | 10979549-10979643                        | 10979348                                          | 10984460                                          | 5112                                              | TSS,CpG,5'CAGE,Ditags,ESTs,polyA |
| <a href="#">hsa-mir-124a-1</a>                  | 8 (-)               | 9798308-9798392                          | 9794986                                           | 9800634                                           | 5648                                              | TSS,CpG,5'CAGE,ESTs,polyA        |
| <a href="#">hsa-mir-99b~let-7e~125a</a>         | 19 (+)              | 56887677-56888404                        | 56885133                                          | 56888521                                          | 3388                                              | TSS,CpG,5'CAGE,ESTs              |
| <a href="#">hsa-mir-424~503</a>                 | X (-)               | 133508407-133508094                      | 133508008                                         | 133511322                                         | 3314                                              | TSS,CpG,5'CAGE,ESTs              |
| <a href="#">hsa-mir-200b~200a~429</a>           | 1 (+)               | 1092347-1094330                          | 1088033                                           | 1094500                                           | 6467                                              | TSS,CpG,5'CAGE,Ditags,ESTs       |
| <a href="#">hsa-mir-223</a>                     | X (+)               | 65155437-65155546                        | 65152025                                          | 65156338                                          | 4313                                              | ESTs,5'CAGE,polyA                |
| <a href="#">hsa-mir-23a~27a~24~2</a>            | 19 (-)              | 13808101-13808473                        | 13804510                                          | 13808884                                          | 4374                                              | ESTs,polyA                       |
| <a href="#">hsa-mir-219-2</a>                   | 9 (-)               | 130194718-130194814                      | 130193109                                         | 130195318                                         | 2209                                              | TSS,CpG,5'CAGE,Ditags,ESTs       |
| <a href="#">hsa-mir-106a~20b~19b-2~92-2~363</a> | X (-)               | 133131074-133131974                      | 133129103                                         | 133133925                                         | 4822                                              | TSS,CpG,polyA                    |
| <a href="#">hsa-mir-802</a>                     | 21 (+)              | 36014883-36014976                        | 36009993                                          | 36018276                                          | 8283                                              | Ditags                           |
| <a href="#">hsa-mir-142</a>                     | 17 (-)              | 53763592-53763678                        | 53763264                                          | 53764936                                          | 1672                                              | TSS,5'CAGE,ESTs,polyA            |
| <a href="#">hsa-let-7i</a>                      | 12 (+)              | 61283733-61283816                        | 61283559                                          | 61284132                                          | 573                                               | TSS,CpG,ESTs,Ditags              |
| <a href="#">hsa-mir-493</a>                     | 14 (+)              | 100405150-100405238                      | 100401271                                         | 100409002                                         | 7731                                              | ESTs, Ditags                     |
| <a href="#">hsa-mir-210</a>                     | 11 (-)              | 558089-558198                            | 555660                                            | 558587                                            | 2927                                              | TSS,CpG,5'CAGE,ESTs,polyA        |
| <a href="#">hsa-mir-92b</a>                     | 1 (+)               | 153431592-153431687                      | 153431072                                         | 153432003                                         | 931                                               | TSS,CpG,5'CAGE,ESTs,Ditags       |
