# Supplementary material
Source: PubMed Central journal article supplement (PMC2077053)
Supplement: pnas_0703890104_8.pdf [file pnas_0703890104_8.pdf]

**Table 6. Length of transcripts > 10 kb**

| miRNA/cluster                        | Chromosome (Strand) | Genomic coordinates of pre-miRNA/cluster | Approximate 5' boundary of the primary transcript | Approximate 3' boundary of the primary transcript | Approximate length (bp) of the primary transcript | Supporting evidences      |
|--------------------------------------|---------------------|------------------------------------------|---------------------------------------------------|---------------------------------------------------|---------------------------------------------------|---------------------------|
| <a href="#">hsa-mir-193b~365-1</a>   | 16 (+)              | 14305325-14310729                        | 14303596                                          | 14315047                                          | 11451                                             | TSS,CpG,5'CAGE,ESTs,polyA |
| <a href="#">hsa-mir-374~545</a>      | X (-)               | 73423664-73423917                        | 73416950                                          | 73429102                                          | 12152                                             | TSS,5'CAGE,ESTs,polyA     |
| <a href="#">hsa-mir-15a-16-1</a>     | 13 (-)              | 49521110-49521338                        | 49516048                                          | 49554190                                          | 38142                                             | TSS,CpG,ESTs,polyA        |
| <a href="#">hsa-mir-181c~181d</a>    | 19 (+)              | 13846513-13846825                        | 13837066                                          | 13848576                                          | 11510                                             | TSS,CpG,ESTs,polyA        |
| <a href="#">hsa-let-7a-1~7f-1~7d</a> | 9 (+)               | 95978060-95981023                        | 95968554                                          | 95981591                                          | 13037                                             | TSS,CpG,5'CAGE,ESTs,polyA |
| <a href="#">hsa-mir-183~96~182</a>   | 7 (-)               | 129197459-129202090                      | 129191947                                         | 129207520                                         | 15573                                             | TSS,CpG,5'CAGE,ESTs       |
| <a href="#">hsa-mir-9-2</a>          | 5 (-)               | 87998427-87998513                        | 87996020                                          | 88006038                                          | 10018                                             | TSS,CpG,5'CAGE,ESTs,polyA |
| <a href="#">hsa-mir-222~221</a>      | X (-)               | 45490529-45491474                        | 45489851                                          | 45595877                                          | 106026                                            | TSS,CpG,5'CAGE,ESTs,polyA |
