# Supplementary material
Source: PubMed Central journal article supplement (PMC2077053)
Supplement: pnas_0703890104_9.pdf [file pnas_0703890104_9.pdf]

**Table 7. Prediction of only 5' or 3' end**

| miRNA/cluster           | Chromosome (Strand) | Genomic coordinates of the miRNA cluster | Approximate 5' boundary of the primary transcript | Approximate 3' boundary of the primary transcript | Approximate length (bp) of the primary transcript | Supporting evidences |
|-------------------------|---------------------|------------------------------------------|---------------------------------------------------|---------------------------------------------------|---------------------------------------------------|----------------------|
| hsa-mir-143~145         | X (-)               | 148788674-148790489                      | 133511337                                         | -                                                 | -                                                 | TSS,CpG,5'CAGE       |
| hsa-mir-424~503         | X (-)               | 133508024-133508407                      | 26910311                                          | -                                                 | -                                                 | TSS,CpG,5'CAGE       |
| hsa-mir-193a            | 17 (+)              | 26911128-26911215                        | 61279194                                          | -                                                 | -                                                 | TSS,CpG,5'CAGE       |
| hsa-mir-124a-3          | 20 (+)              | 61280297-61280383                        | 98581691                                          | -                                                 | -                                                 | TSS,CpG,5'CAGE       |
| hsa-mir-607             | 10 (-)              | 98578416-98578511                        | 44079213                                          | -                                                 | -                                                 | TSS,5'CAGE           |
| hsa-mir-196a-1          | 17 (-)              | 44064851-44064920                        | 103653207                                         | -                                                 | -                                                 | TSS,CpG              |
| hsa-mir-203             | 14 (+)              | 103653495-103653604                      | 1901236                                           | -                                                 | -                                                 | TSS,CpG              |
| hsa-mir-212-132         | 17 (-)              | 1899952-1900424                          | 133506262                                         | -                                                 | -                                                 | CpG,Ditags           |
| hsa-mir-542~450-2~450-1 | X (-)               | 133502037-133503133                      | 20336451                                          | -                                                 | -                                                 | TSS,CpG,5'CAGE       |
| hsa-mir-130b            | 22 (+)              | 20337593-20337674                        | 86948918                                          | -                                                 | -                                                 | TSS,5'CAGE           |
| hsa-mir-7-2             | 15 (+)              | 86956060-86956169                        | 219574684                                         | -                                                 | -                                                 | TSS,CpG              |
| hsa-mir-375             | 2 (-)               | 219574611-219574674                      | 43557309                                          | -                                                 | -                                                 | TSS,CpG,5'CAGE       |
| hsa-mir-129-2           | 11 (+)              | 43559520-43559609                        | 45705764                                          | -                                                 | -                                                 | TSS,CpG              |
| hsa-mir-565             | 3 (-)               | 45705468-45705564                        | 44014642                                          | -                                                 | -                                                 | TSS,CpG,5'CAGE       |
| hsa-mir-10a             | 17 (-)              | 44012199-44012308                        | 99842787                                          | -                                                 | -                                                 | TSS,CpG,5'CAGE       |
| hsa-mir-345             | 14 (+)              | 99843949-99844046                        | 16863701                                          | -                                                 | -                                                 | TSS,CpG,5'CAGE       |
| hsa-mir-648             | 22 (-)              | 16843634-16843727                        | 65305876                                          | -                                                 | -                                                 | TSS,CpG,5'CAGE       |
| hsa-mir-101-1           | 1 (-)               | 65296705-65296779                        | 24081832                                          | -                                                 | -                                                 | TSS,5'CAGE           |
| hsa-mir-573             | 4 (-)               | 24130913-24131011                        | 57162485                                          | -                                                 | -                                                 | TSS,5'CAGE           |
| hsa-mir-130a            | 11 (+)              | 57165247-57165335                        | 28842178                                          | -                                                 | -                                                 | TSS,5'CAGE           |
| hsa-mir-801             | 1 (+)               | 28847698-28847793                        | -                                                 | -                                                 | -                                                 | ESTs,polyA           |
| hsa-mir-614             | 12 (+)              | 12960030-12960119                        | -                                                 | 12962140                                          | -                                                 | ESTs,polyA           |
| hsa-let-7b              | 22 (+)              | 44888230-44888312                        | -                                                 | 44888453                                          | -                                                 | ESTs                 |
