# Supplementary material
Source: PubMed Central journal article supplement (PMC2077053)

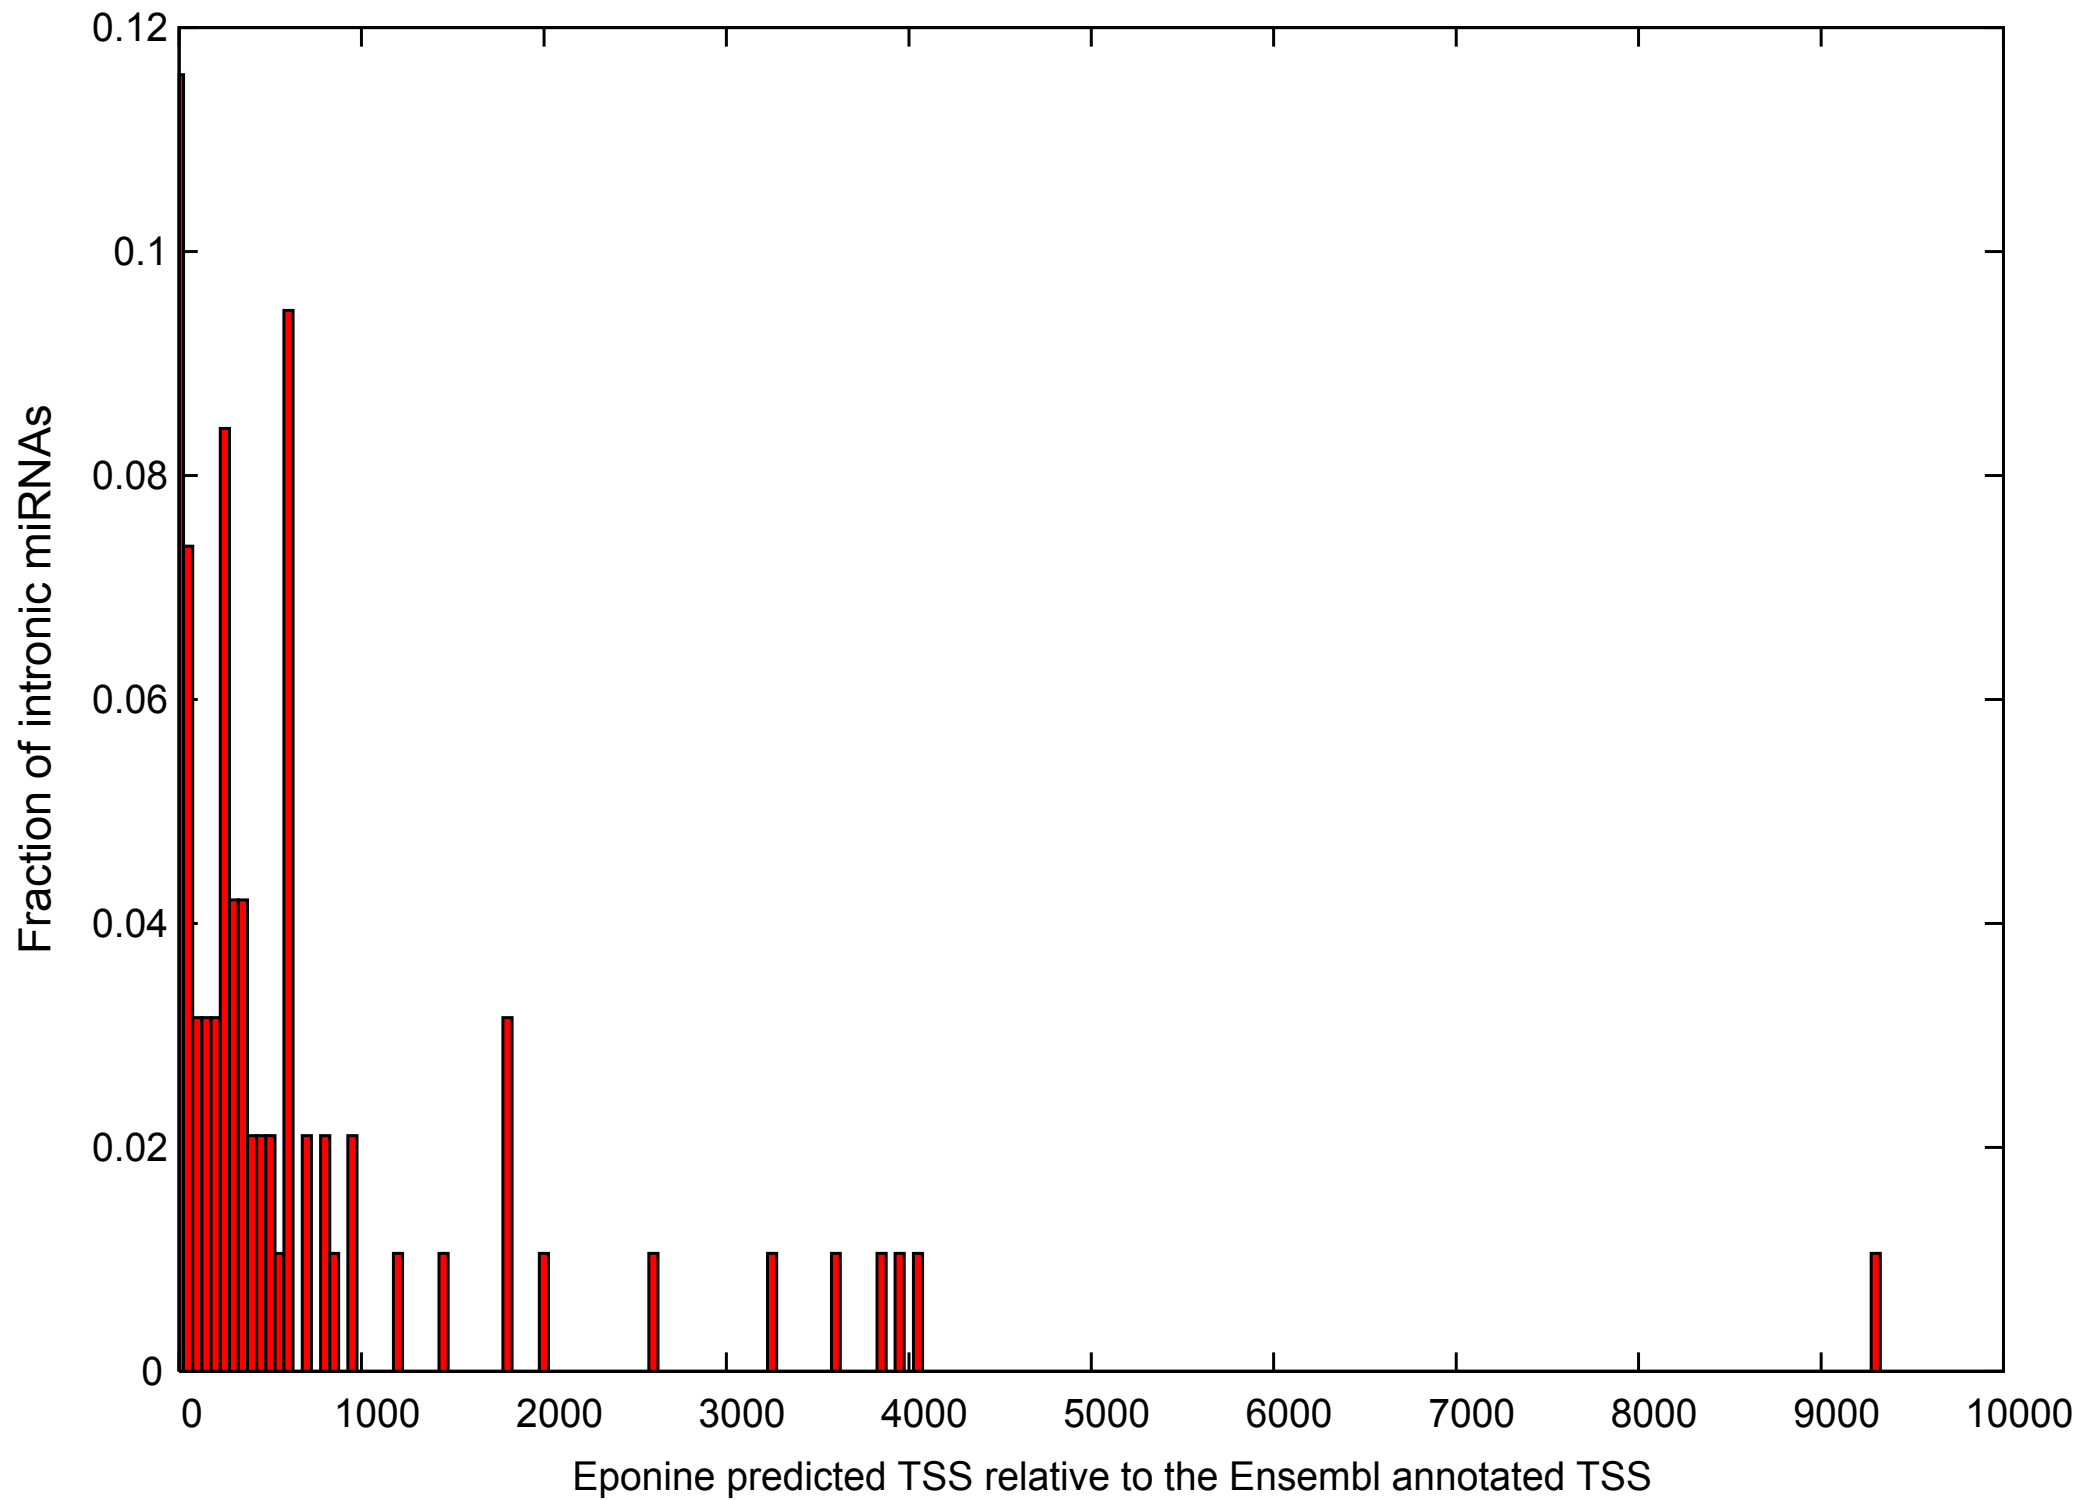

Supplement: pnas_0703890104_1.pdf [file pnas_0703890104_1.pdf]

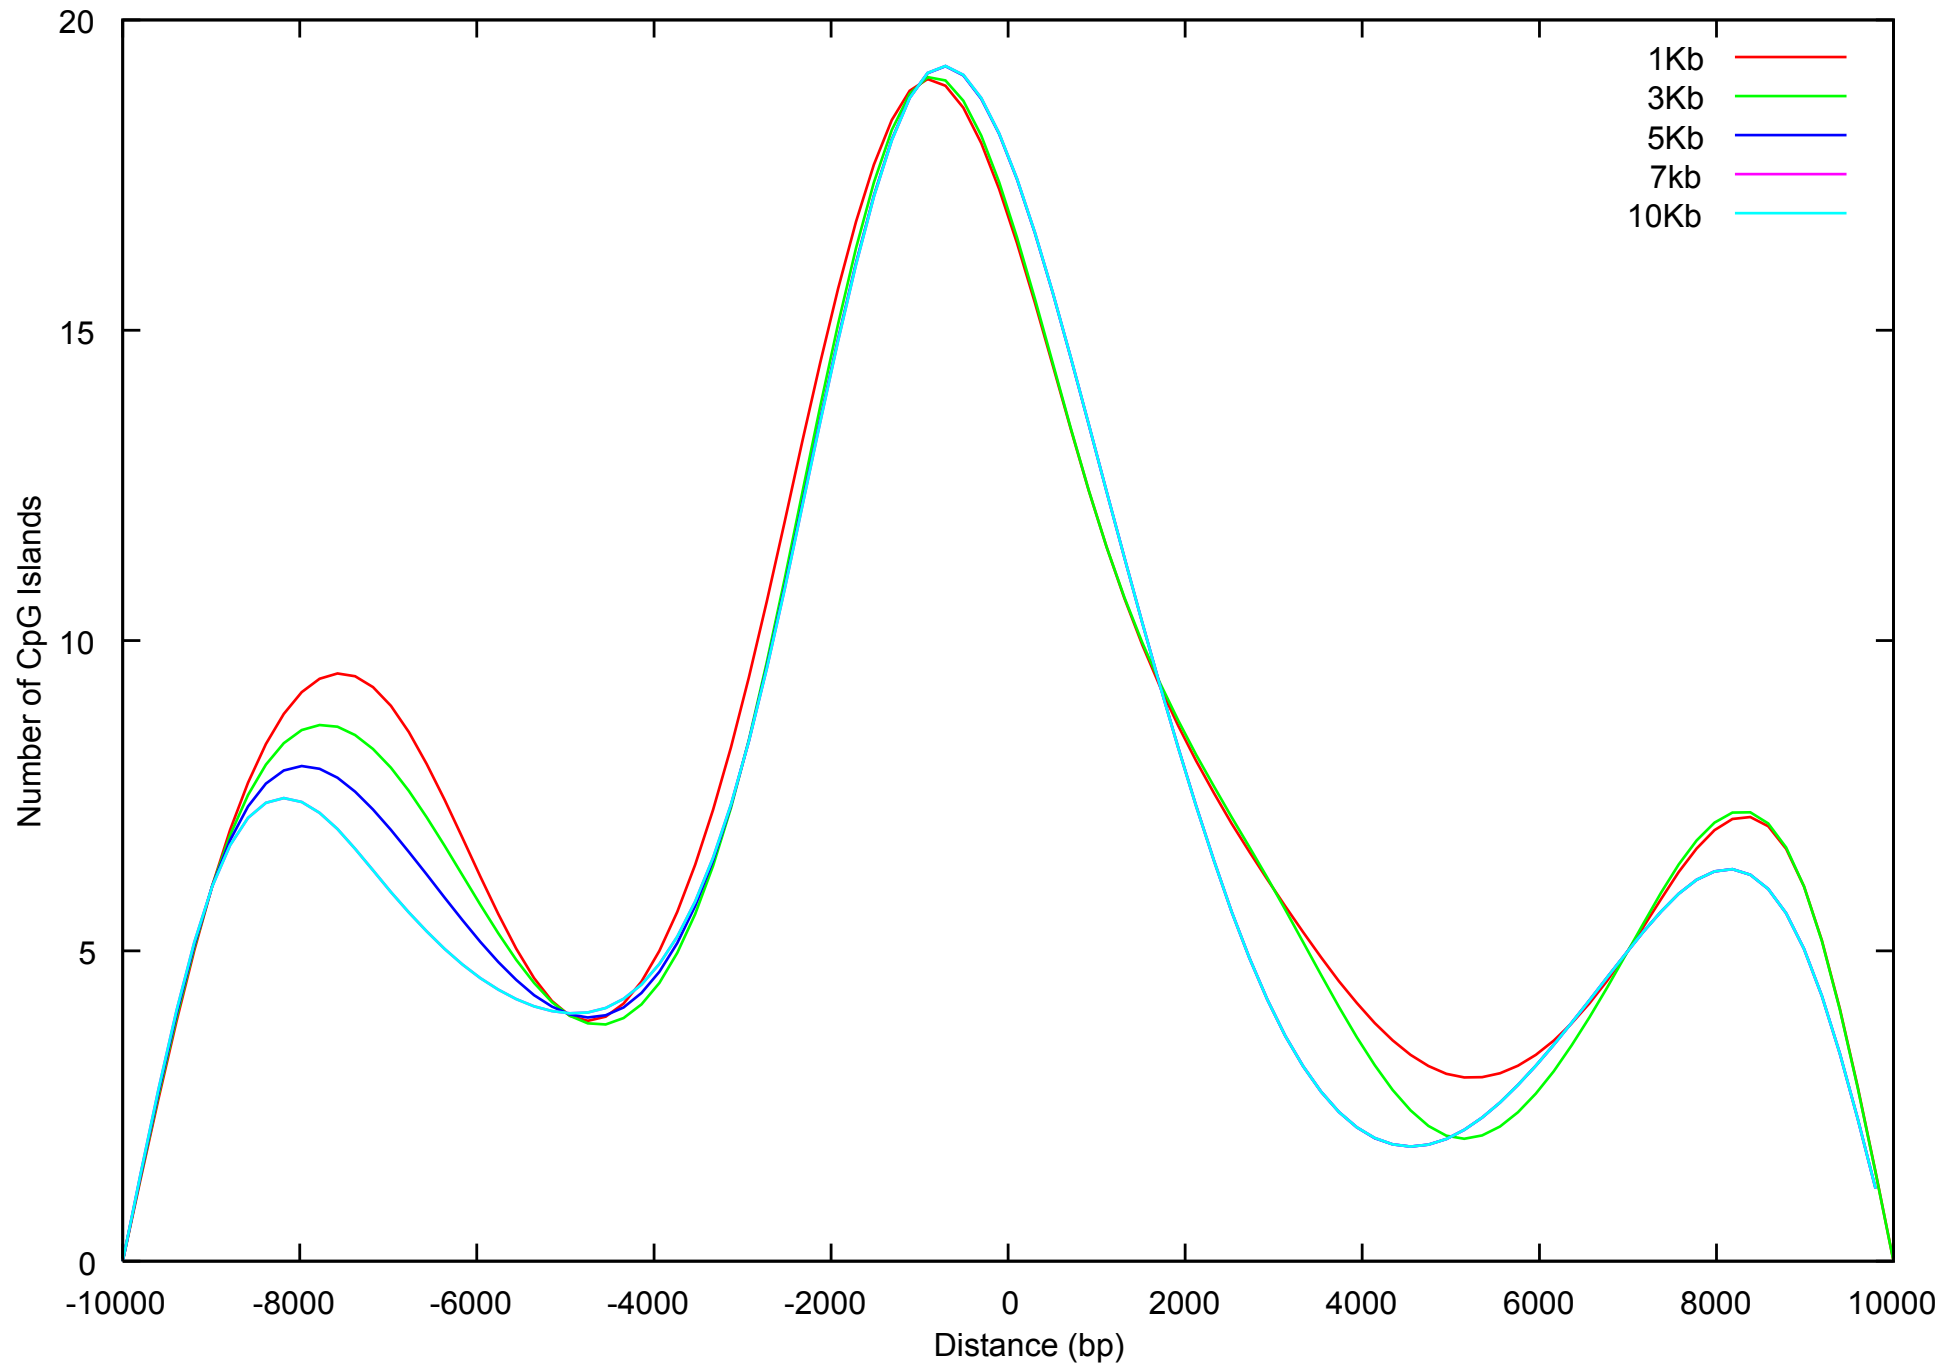

Supplement: pnas_0703890104_2.pdf [file pnas_0703890104_2.pdf]

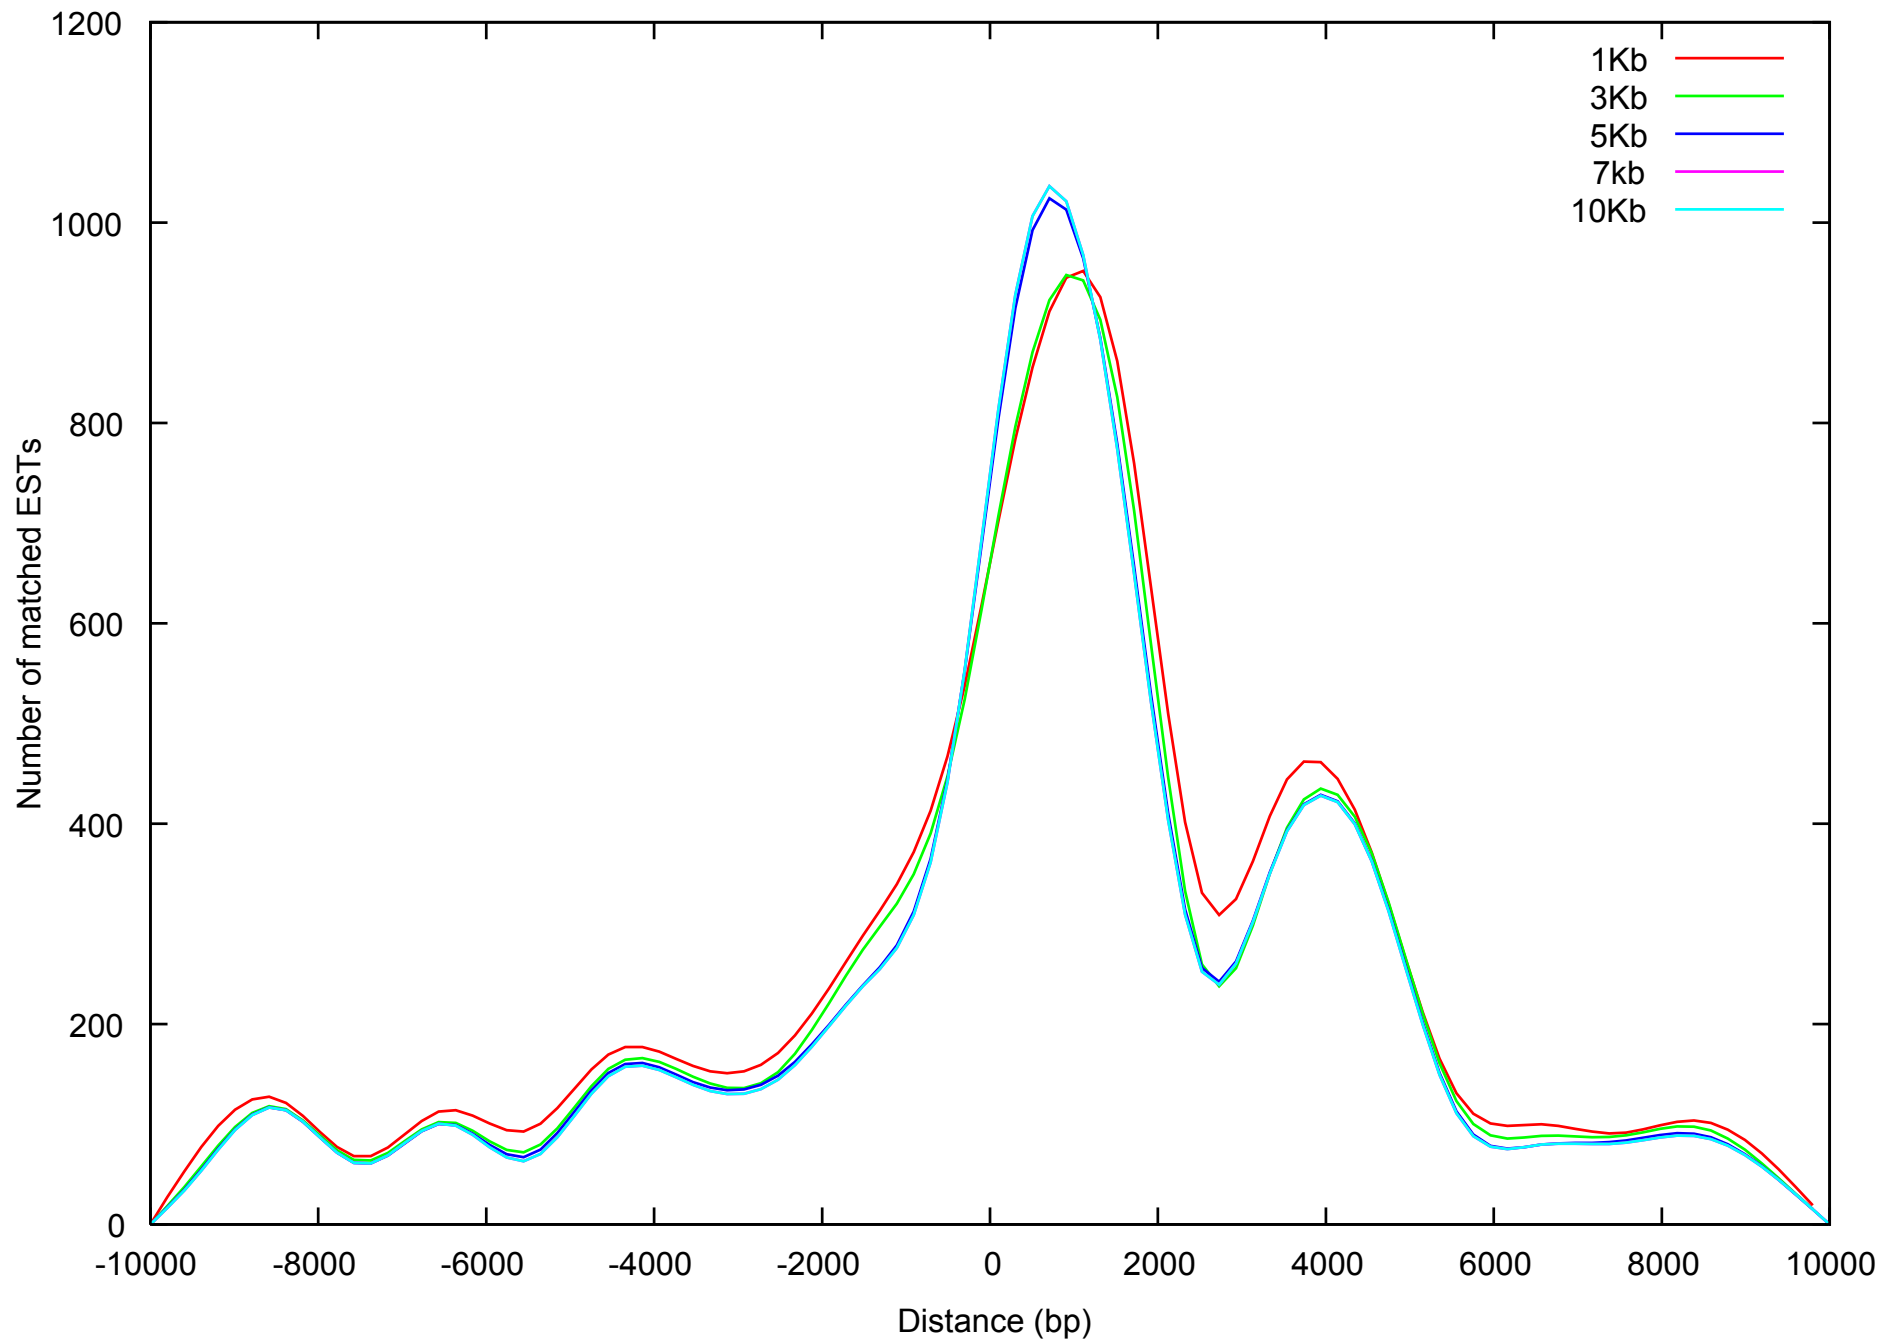

Supplement: pnas_0703890104_3.pdf [file pnas_0703890104_3.pdf]

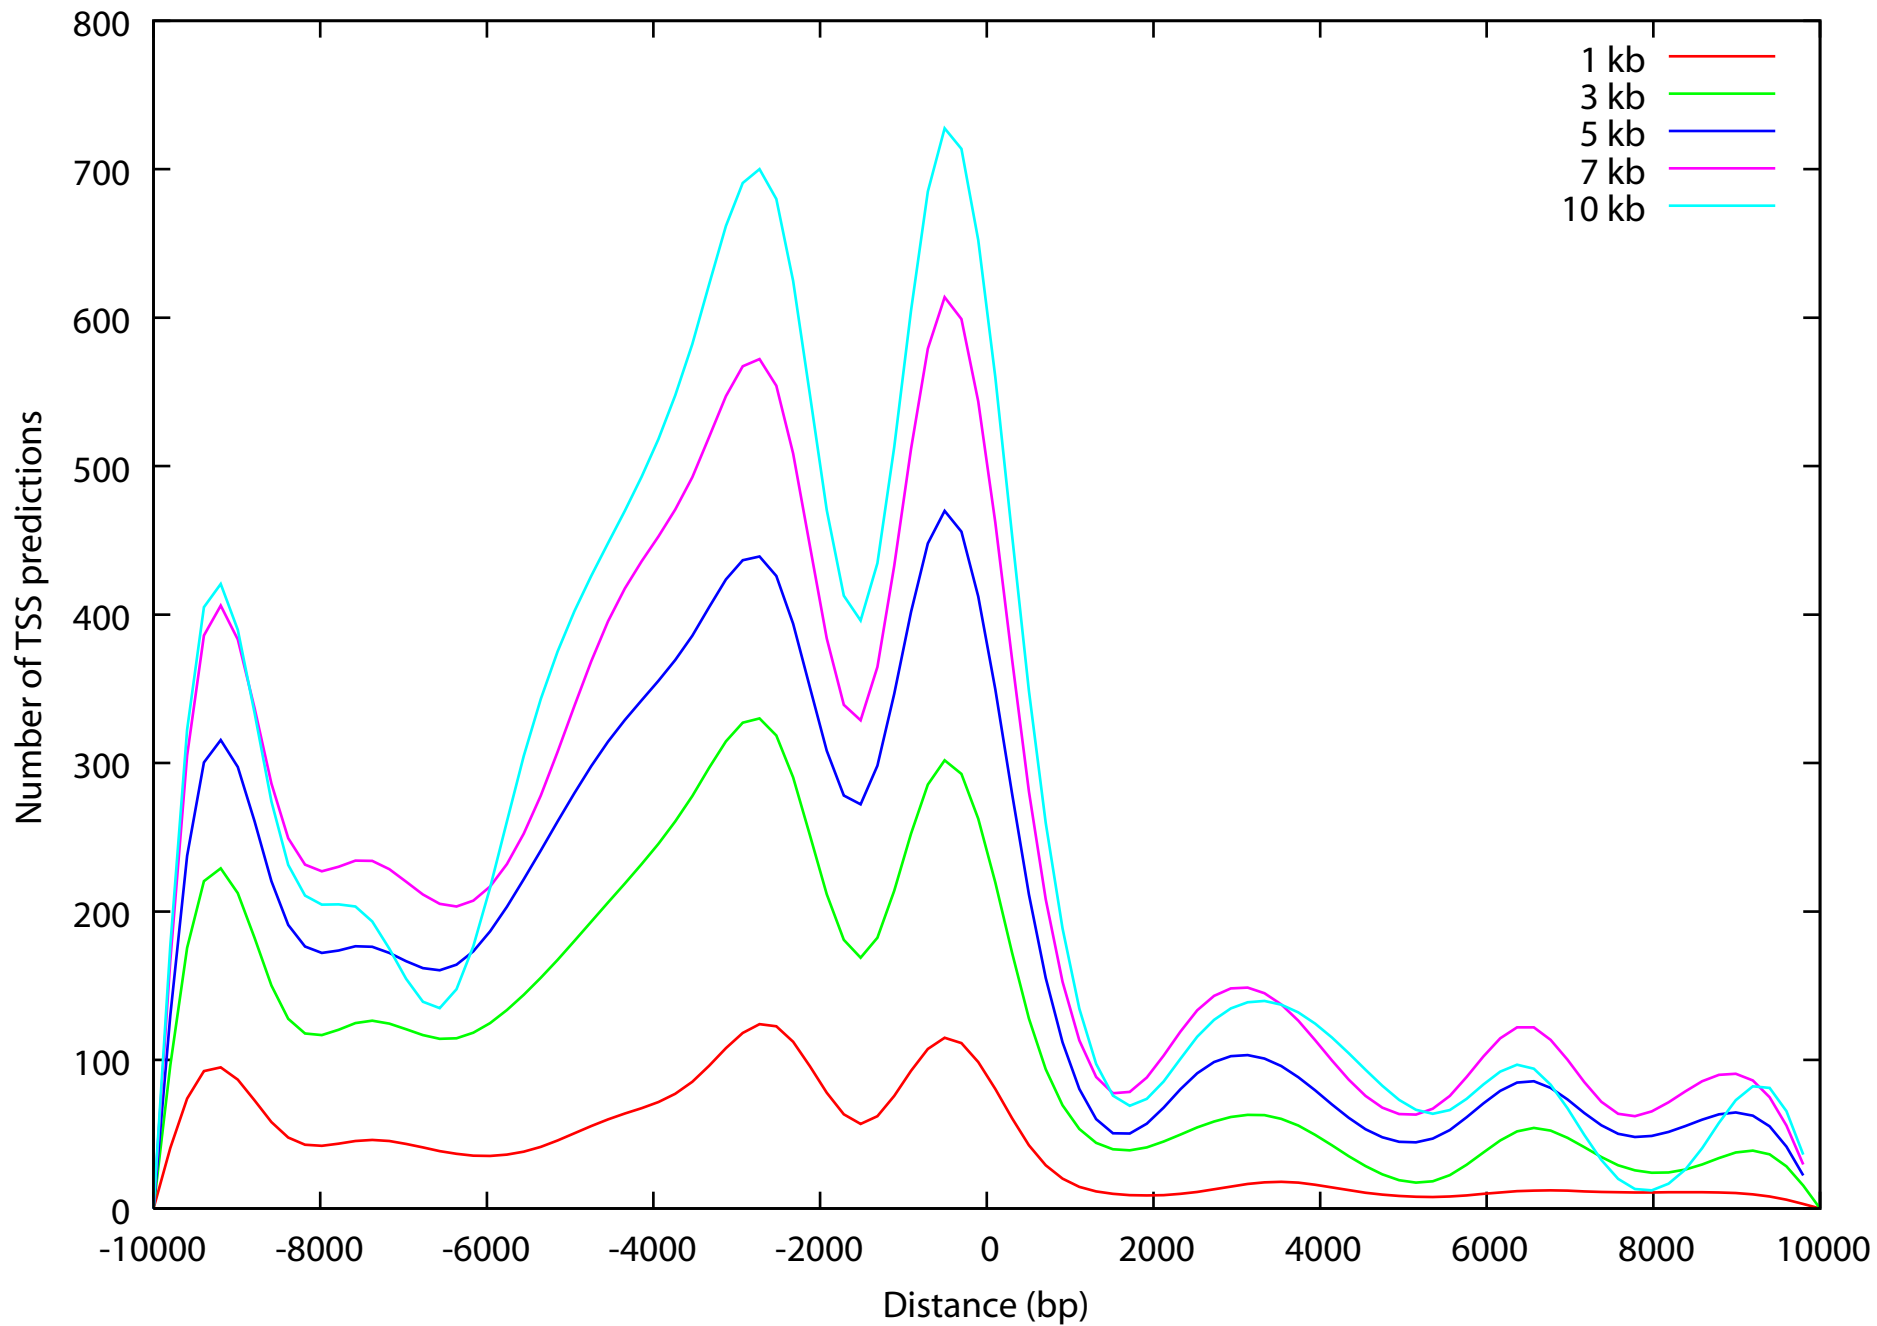

Supplement: pnas_0703890104_4.pdf [file pnas_0703890104_4.pdf]
